# Supplementary material
Source: PubMed Central journal article supplement (PMC4128881)
Supplement: cc-13-2359-s01.pdf [file cc-13-2359-s01.pdf]

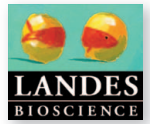

## **Supplemental Material to:**

**Woo-In Jang, Yu-jin Jo, Hak-Cheol Kim, Jia-Lin Jia, Suk  
Namgoong, and Nam-Hyung Kim**

**Non-muscle tropomyosin (Tpm3) is crucial for asymmetric  
cell division and maintenance of cortical integrity in  
mouse oocytes**

**Cell Cycle 2014; 13(15)**

**<http://dx.doi.org/10.4161/cc.29333>**

**<http://www.landesbioscience.com/journals/cc/article/29333>**

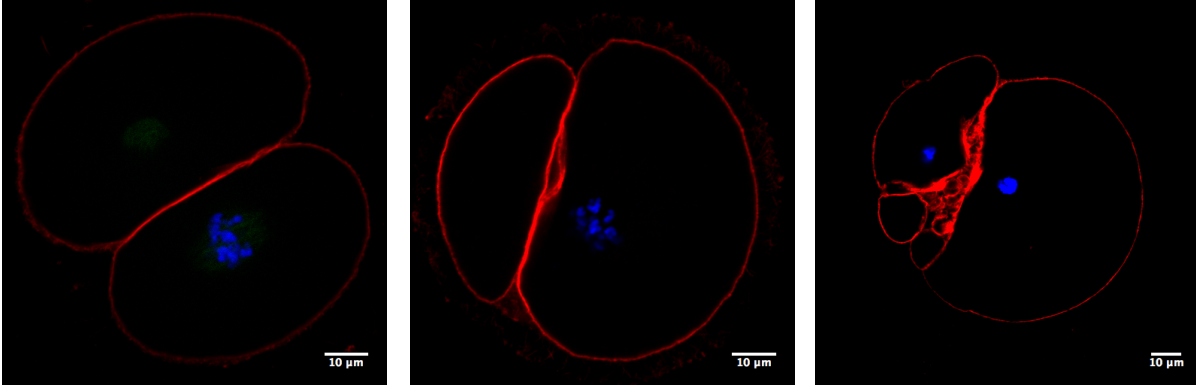

**Supplementary Fig. 1. Jang et al.**

## **Supplementary Videos**

Video S1. Time-lapse movie of oocytes injected with control small interfering RNA (siRNA). Hoechst 33342 staining of chromatin is shown in blue. The frame interval is 300 s and the movie is 12,600 s long.

Video S2. Bleb formation in an oocyte injected with Tpm3-targeting small interfering RNA (siRNA). After bleb formation, a small polar body is protruded. Hoechst 33342 staining of chromatin is shown in blue. The frame interval is 300 s and the movie is 27,000 s long.

Video S3. Symmetric division of an oocyte injected with Tpm3-targeting small interfering RNA (siRNA). A bleb forms just before cytokinesis and chromatin remains in the center of the oocyte. Hoechst 33342 staining of chromatin is shown in blue. The frame interval is 300 and the movie is 27,000 s long.

Video S4. Failure of cytokinesis completion in an oocyte injected with Tpm3-targeting small interfering RNA (siRNA). Hoechst 33342 staining of chromatin is shown in blue. The frame interval is 300 s and the movie is 27,000 s long.

## **Supplementary Figure**

**Supplementary Figure 1.** Symmetric division observed in Tpm3-targeting siRNA-injected oocytes. Red: actin; blue: DNA.
